# Supplementary material for: Potential Cardioprotective Effects and Lipid Mediator Differences in Long-Chain Omega-3 Polyunsaturated Fatty Acid Supplemented Mice Given Chemotherapy
Source: MDPI journal article supplement (doi:10.3390/metabo12090782), 2022-08-24
Supplement: s1 [file s1]

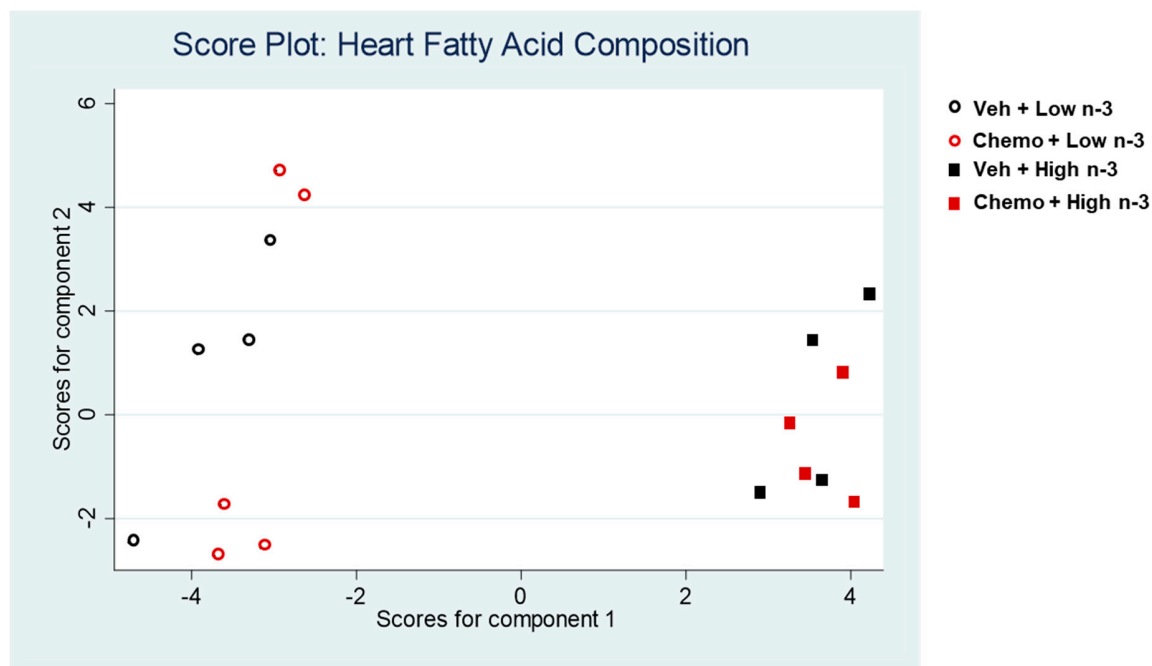

**Figure S1:** Scores plot from the principal component analysis of the heart fatty acid composition. Graph was made using Stata/IC 15.1 (StataCorp College Station, TX). Veh – saline vehicle injections; Chemo – 9 mg/kg anthracycline + 90 mg/kg cyclophosphamide injections; Low n-3 – 0 g/kg EPA+DHA diet; High n-3 – 12.2 g/kg EPA+DHA diet (~2% kcal).

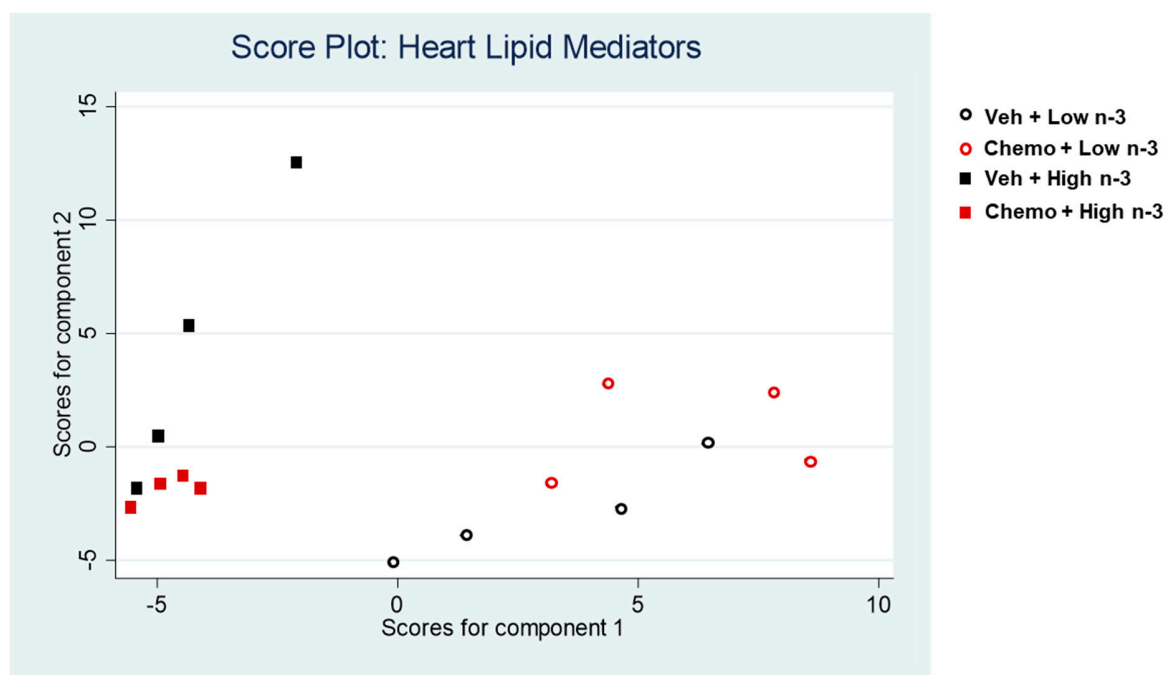

**Figure S2:** Score plot from the principal component analysis of the heart mitochondrial lipid mediators. Graph was made using Stata/IC 15.1 (StataCorp College Station, TX). Veh – saline vehicle injections; Chemo – 9 mg/kg anthracycline + 90 mg/kg cyclophosphamide injections; Low n-3 – 0 g/kg EPA+DHA diet; High n-3 – 12.2 g/kg EPA+DHA diet (~2% kcal).

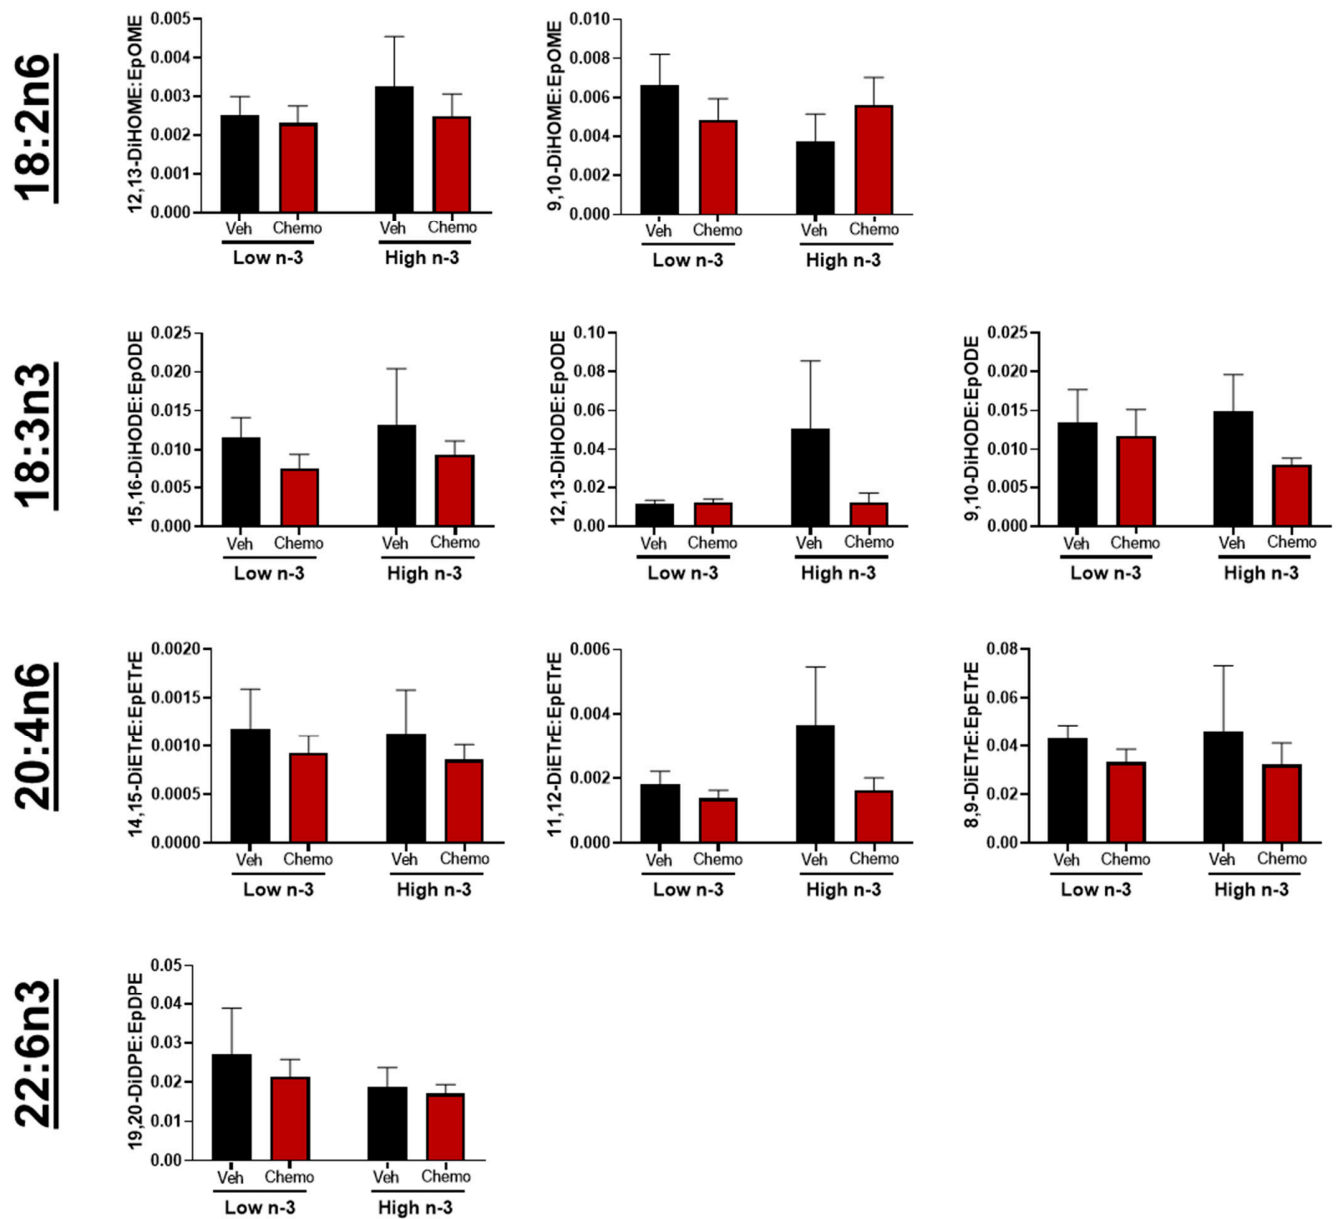

**Figure S3.** Ratios of vicinal diol to their parent epoxide. Data presented as group means  $\pm$  SEM ( $n = 4/\text{group}$ ). A two-way ANOVA with an interaction was used to detect the differences between groups. Veh – saline vehicle injections; Chemo – 9 mg/kg anthracycline + 90 mg/kg cyclophosphamide injections; Low n-3 – 0 g/kg EPA+DHA diet; High n-3 – 12.2 g/kg EPA+DHA diet (~2% kcal).

**Table S1.** Composition of experimental diets (prepared by Research Diets Inc., RDI)

| <b>RDI Product #</b> | <b>D13091002B</b> | <b>D15082608</b> |
|----------------------|-------------------|------------------|
|                      | Low n-3 Diet      | High n-3 Diet    |
|                      | <b>Diet 4</b>     | <b>Diet 2</b>    |
| <b>Ingredient</b>    | <b>gm</b>         | <b>Gm</b>        |
| Casein               | 232.5             | 205              |
| DL-Methionine        | 3                 | 3                |
| Corn Starch          | 450               | 450              |
| Sucrose              | 100               | 100              |
| Maltodextrin 10      | 100               | 100              |
| Cellulose, BW200     | 50                | 50               |
| Soybean Oil          | 90                | 41               |
| MEG-3, 30% Powder    | 0                 | 81               |
| Corn Oil             | 0                 | 0                |
| Mineral Mix S10001   | 35                | 35               |
| Vitamin Mix V10001   | 10                | 10               |
| Choline Bitartrate   | 2                 | 2                |
| FD&C Yellow Dye #5   | 0.025             | 0                |
| FD&C Red Dye #40     | 0                 | 0.05             |
| FD&C Blue Dye #1     | 0.025             | 0                |
| <b>Total</b>         | <b>1072.55</b>    | <b>1072.05</b>   |
| Protein (gm)         | 205.3             | 205.2            |
| Carbohydrate (gm)    | 650               | 650              |
| Fat (gm)             | 90                | 89.8             |
| Fiber (gm)           | 50                | 50               |
| Protein (kcal)       | 821.1             | 820.6            |
| Carbohydrate (kcal)  | 2600              | 2600             |
| Fat (kcal)           | 810               | 808.2            |
| Total kcal           | 4231.1            | 4228.8           |
| Protein (gm%)        | 19                | 19               |
| Carbohydrate (gm%)   | 61                | 61               |
| Fat (gm%)            | 8                 | 8                |
| Protein(kcal%)       | 19                | 19               |
| Carbohydrate(kcal%)  | 61                | 61               |
| Fat (kcal%)          | 19                | 19               |

**Table S2.** Fatty acid composition of the experimental diets. Values are averages of triplicate analysis by gas chromatography, ND - Not detectable.

|           | Low n-3 Diet  |           | High n-3 Diet |           |
|-----------|---------------|-----------|---------------|-----------|
|           | <i>Mean %</i> | <i>SD</i> | <i>Mean %</i> | <i>SD</i> |
| C14:0     | 0.4285        | 0.0643    | 3.9649        | 0.1351    |
| C16:0     | 11.0826       | 0.1633    | 15.8085       | 0.1126    |
| C16:1n7   | 0.1121        | 0.0067    | 4.6269        | 0.1143    |
| C16:2n4   | ND            | ND        | 0.6594        | 0.0220    |
| C16:3n4   | 0.0388        | 0.0000    | 0.7631        | 0.0158    |
| C18:0     | 4.0678        | 0.1251    | 3.9742        | 0.0336    |
| C18:1n9   | 21.2491       | 0.3757    | 15.1007       | 0.1886    |
| C18:1n7   | 1.4156        | 0.0212    | 2.1620        | 0.0064    |
| C18:2n6   | 54.6681       | 0.3481    | 27.4554       | 0.5124    |
| C18:3n6   | ND            | ND        | 0.1747        | 0.0035    |
| C18:3n3   | 6.3831        | 0.1438    | 3.6822        | 0.0622    |
| C18:4n3   | ND            | ND        | 2.0039        | 0.0317    |
| C20:0     | 0.2941        | 0.0210    | 0.4932        | 0.0033    |
| C20:1n9   | 0.2860        | 0.0373    | 0.9943        | 0.0053    |
| C20:2n6   | ND            | ND        | 0.1234        | 0.0016    |
| C20:3n6   | ND            | ND        | 0.0987        | 0.0045    |
| C20:4n6   | ND            | ND        | 0.4923        | 0.0024    |
| C20:4n3   | ND            | ND        | 0.5551        | 0.0113    |
| C20:5n3   | ND            | ND        | 9.0097        | 0.1618    |
| C22:4n6   | ND            | ND        | ND            | ND        |
| C22:5n6   | ND            | ND        | 0.1502        | 0.0035    |
| C22:5n3   | ND            | ND        | 0.8362        | 0.0125    |
| C22:6n3   | ND            | ND        | 6.8710        | 0.1857    |
| Total n-3 | 6.3831        | 0.1438    | 11.9445       | 0.1466    |
| Total n-6 | 54.6681       | 0.3481    | 28.3200       | 0.5092    |
| n-3/n-6   | 0.1168        | 0.0021    | 0.4219        | 0.0127    |
| n-6/n-3   | 8.5668        | 0.1575    | 2.3715        | 0.0717    |
| Sat FA    | 15.8731       | 0.2113    | 24.2408       | 0.2170    |
| MUFA      | 23.0628       | 0.4124    | 22.8839       | 0.0816    |
| PUFA      | 61.0512       | 0.4664    | 50.1083       | 0.1800    |

**Table S3.** Heart mitochondrial lipid mediators (part 1 of 3). Unless otherwise noted units are in pmol/g. Low extraction efficiency or uncalibrated analytes are reported as relative abundance (%) across the experiment. Data is presented as group means  $\pm$  SEM ( $n = 4/\text{group}$ ). A two-way ANOVA with a diet  $\times$  chemo interaction was used to detect the differences between factors.  $P < 0.05$  are bolded. PGs-prostaglandins. Vehicle – saline vehicle injections; Chemo – 9 mg/kg anthracycline + 90 mg/kg cyclophosphamide injections; Low n-3 – 0 g/kg EPA+DHA diet; High n-3 – 12.2 g/kg EPA+DHA diet (~2% kcal).

|                          |        |                               | Low n-3         |                 | High n-3        |                 | Diet X Chemo | Diet            | Chemo |
|--------------------------|--------|-------------------------------|-----------------|-----------------|-----------------|-----------------|--------------|-----------------|-------|
|                          |        |                               | Vehicle         | Chemo           | Vehicle         | Chemo           |              |                 |       |
| PGs                      | 20:4n6 | PGF <sub>2</sub> $\alpha$ (%) | 6.31 $\pm$ 1.07 | 7.36 $\pm$ 1.85 | 3.35 $\pm$ 1.21 | 3.07 $\pm$ 0.81 | 0.62         | <b>0.02</b>     | 0.77  |
|                          |        | F2 Isoprostane (%)            | 4.55 $\pm$ 0.71 | 4.99 $\pm$ 0.83 | 4.40 $\pm$ 0.77 | 4.18 $\pm$ 0.93 | 0.69         | 0.57            | 0.90  |
|                          | 20:5n3 | PGF <sub>3</sub> $\alpha$ (%) | 2.87 $\pm$ 0.32 | 3.42 $\pm$ 0.58 | 4.05 $\pm$ 0.53 | 4.33 $\pm$ 0.78 | 0.82         | 0.10            | 0.49  |
| Mono-Hydroxy Fatty Acids | 18:2n6 | 13-HODE                       | 632 $\pm$ 125   | 730 $\pm$ 159   | 491 $\pm$ 117   | 438 $\pm$ 90    | 0.56         | 0.11            | 0.86  |
|                          |        | 9-HODE                        | 345 $\pm$ 67    | 400 $\pm$ 99    | 229 $\pm$ 58    | 219 $\pm$ 48    | 0.66         | 0.06            | 0.75  |
|                          | 18:3n3 | 13-HOTE                       | 12.4 $\pm$ 7.48 | 6.18 $\pm$ 1.19 | 4.70 $\pm$ 1.10 | 3.43 $\pm$ 0.66 | 0.54         | 0.20            | 0.35  |
|                          |        | 9-HOTE                        | 3.58 $\pm$ 0.56 | 3.37 $\pm$ 0.85 | 3.09 $\pm$ 0.59 | 2.23 $\pm$ 0.33 | 0.60         | 0.20            | 0.40  |
|                          | 20:4n6 | 15-HETE                       | 100 $\pm$ 23.1  | 136 $\pm$ 34.7  | 36.4 $\pm$ 5.8  | 41.5 $\pm$ 7.9  | 0.49         | <b>&lt;0.01</b> | 0.36  |
|                          |        | 12-HETE                       | 883 $\pm$ 730   | 315 $\pm$ 123   | 139 $\pm$ 54    | 87 $\pm$ 30     | 0.50         | 0.22            | 0.42  |
|                          |        | 11-HETE                       | 60.7 $\pm$ 15.4 | 69.3 $\pm$ 12.9 | 17.5 $\pm$ 2.4  | 21.9 $\pm$ 4.0  | 0.84         | <b>&lt;0.01</b> | 0.54  |
|                          |        | 9-HETE                        | 28.9 $\pm$ 5.1  | 41.1 $\pm$ 8.1  | 14.5 $\pm$ 2.1  | 16.7 $\pm$ 2.6  | 0.34         | <b>&lt;0.01</b> | 0.18  |
|                          |        | 8-HETE                        | 26.9 $\pm$ 5.1  | 35.3 $\pm$ 7.4  | 12.7 $\pm$ 1.7  | 13.5 $\pm$ 2.0  | 0.43         | <b>&lt;0.01</b> | 0.34  |
|                          |        | 5-HETE                        | 201 $\pm$ 27    | 227 $\pm$ 23    | 91 $\pm$ 11     | 84 $\pm$ 7      | 0.40         | <b>&lt;0.01</b> | 0.64  |
|                          | 20:5n3 | 15-HEPE                       | 1.8 $\pm$ 0.2   | 1.9 $\pm$ 0.3   | 14.2 $\pm$ 2.8  | 11.1 $\pm$ 1.5  | 0.31         | <b>&lt;0.01</b> | 0.37  |
|                          |        | 12-HEPE                       | 51 $\pm$ 27     | 40 $\pm$ 9      | 695 $\pm$ 321   | 394 $\pm$ 113   | 0.41         | <b>0.01</b>     | 0.38  |
|                          |        | 9-HEPE                        | 0.7 $\pm$ 0.2   | 1.0 $\pm$ 0.1   | 12.7 $\pm$ 1.9  | 10.5 $\pm$ 1.2  | 0.29         | <b>&lt;0.01</b> | 0.42  |
|                          |        | 5-HEPE                        | 6.8 $\pm$ 1.1   | 6.4 $\pm$ 0.6   | 117 $\pm$ 16    | 95.5 $\pm$ 7.6  | 0.24         | <b>&lt;0.01</b> | 0.22  |
|                          | 22:6n3 | 17-HdoHE                      | 214 $\pm$ 48    | 361 $\pm$ 95    | 389 $\pm$ 62    | 515 $\pm$ 97    | 0.90         | 0.058           | 0.11  |
|                          |        | 14-HdoHE                      | 654 $\pm$ 555   | 298 $\pm$ 93    | 763 $\pm$ 273   | 501 $\pm$ 104   | 0.88         | 0.63            | 0.35  |
|                          |        | 4-HdoHE                       | 792 $\pm$ 72    | 1125 $\pm$ 166  | 1340 $\pm$ 121  | 1256 $\pm$ 176  | 0.16         | <b>0.03</b>     | 0.39  |
| Diols                    | 20:4n6 | LTB4                          | 1.35 $\pm$ 0.24 | 1.33 $\pm$ 0.31 | 0.86 $\pm$ 0.06 | 0.62 $\pm$ 0.06 | 0.59         | <b>0.01</b>     | 0.52  |
|                          |        | 6-trans-LTB4                  | 2.36 $\pm$ 1.15 | 1.62 $\pm$ 0.33 | 0.95 $\pm$ 0.14 | 0.52 $\pm$ 0.07 | 0.79         | 0.06            | 0.35  |
|                          |        | 8,15-DiHETE                   | 9.51 $\pm$ 3.14 | 14.4 $\pm$ 3.94 | 3.63 $\pm$ 0.52 | 3.98 $\pm$ 0.54 | 0.39         | <b>0.01</b>     | 0.33  |
|                          |        | 5,15-DiHETE                   | 1.34 $\pm$ 0.49 | 1.85 $\pm$ 0.65 | 0.47 $\pm$ 0.11 | 0.46 $\pm$ 0.10 | 0.55         | <b>0.02</b>     | 0.56  |
|                          | 20:5n3 | LTB5                          | 0.22 $\pm$ 0.04 | 0.20 $\pm$ 0.05 | 0.11 $\pm$ 0.02 | 0.09 $\pm$ 0.01 | 0.98         | <b>0.01</b>     | 0.53  |
| Triol                    | 18:2n6 | 9,12,13-TriHOME (%)           | 2.28 $\pm$ 0.40 | 2.89 $\pm$ 0.51 | 3.59 $\pm$ 0.77 | 2.38 $\pm$ 0.50 | 0.13         | 0.49            | 0.61  |

**Table S4.** Heart mitochondrial lipid mediators (part 2 of 3). Unless otherwise noted units are in pmol/g. Data is presented as group means  $\pm$  SEM ( $n = 4/\text{group}$ ). A two-way ANOVA with a diet  $\times$  chemo interaction was used to detect the differences between factors.  $p < 0.05$  are bolded. Vehicle – saline vehicle injections; Chemo – 9 mg/kg anthracycline + 90 mg/kg cyclophosphamide injections; Low n-3 – 0 g/kg EPA+DHA diet; High n-3 – 12.2 g/kg EPA+DHA diet (~2% kcal).

|               |        |                  | Low n-3         |                  | High n-3         |                 | Diet X Chemo    | Diet            | Chemo       |
|---------------|--------|------------------|-----------------|------------------|------------------|-----------------|-----------------|-----------------|-------------|
|               |        |                  | Vehicle         | Chemo            | Vehicle          | Chemo           |                 |                 |             |
| Epoxides      | 18:1n9 | 9(10)-EpO        | 96.9 $\pm$ 8.3  | 83.3 $\pm$ 9.8   | 73.4 $\pm$ 7.2   | 66.8 $\pm$ 6.1  | 0.67            | <b>0.03</b>     | 0.23        |
|               | 18:2n6 | 12(13)-EpOME     | 3010 $\pm$ 534  | 4535 $\pm$ 536   | 3279 $\pm$ 1254  | 2415 $\pm$ 525  | 0.15            | 0.26            | 0.68        |
|               |        | 12(13)-Ep-9-KODE | 20.1 $\pm$ 3.3  | 23.5 $\pm$ 1.0   | 14.6 $\pm$ 2.2   | 10.0 $\pm$ 0.8  | 0.09            | <b>&lt;0.01</b> | 0.80        |
|               |        | 9(10)-EpOME      | 3453 $\pm$ 700  | 5293 $\pm$ 740   | 4057 $\pm$ 1816  | 2515 $\pm$ 611  | 0.15            | 0.34            | 0.89        |
|               | 18:3n3 | 15(16)-EpODE     | 284 $\pm$ 93    | 350 $\pm$ 95     | 383 $\pm$ 203    | 175 $\pm$ 16    | 0.28            | 0.76            | 0.57        |
|               |        | 12(13)-EpODE     | 42.3 $\pm$ 9.8  | 58.9 $\pm$ 4.0   | 53.1 $\pm$ 20.3  | 37.5 $\pm$ 7.4  | 0.21            | 0.67            | 0.97        |
|               |        | 9(10)-EpODE      | 161 $\pm$ 52    | 208 $\pm$ 41     | 192 $\pm$ 94     | 103 $\pm$ 12    | 0.26            | 0.54            | 0.71        |
|               | 20:4n6 | 14(15)-EpETrE    | 1904 $\pm$ 605  | 2923 $\pm$ 490   | 1188 $\pm$ 482   | 1163 $\pm$ 309  | 0.30            | <b>0.03</b>     | 0.32        |
|               |        | 11(12)-EpETrE    | 964 $\pm$ 249   | 1628 $\pm$ 286   | 700 $\pm$ 300    | 604 $\pm$ 166   | 0.16            | <b>0.03</b>     | 0.29        |
|               |        | 11(12)-EpETrE EA | 1.99 $\pm$ 0.20 | 4.87 $\pm$ 1.03  | 2.40 $\pm$ 0.81  | 1.22 $\pm$ 0.11 | <b>0.01</b>     | -               | -           |
|               |        | 8(9)-EpETrE      | 114 $\pm$ 20    | 243 $\pm$ 47     | 107 $\pm$ 36     | 100 $\pm$ 29    | 0.07            | <b>0.05</b>     | 0.10        |
|               | 20:5n3 | 17(18)-EpETE     | 14 $\pm$ 3      | 23 $\pm$ 4       | 774 $\pm$ 317    | 512 $\pm$ 105   | 0.44            | <b>&lt;0.01</b> | 0.46        |
|               |        | 14(15)-EpETE     | 25 $\pm$ 6      | 40 $\pm$ 14      | 491 $\pm$ 208    | 340 $\pm$ 69    | 0.47            | <b>0.01</b>     | 0.55        |
|               |        | 11(12)-EpETE     | 30 $\pm$ 11     | 43 $\pm$ 18      | 352 $\pm$ 154    | 222 $\pm$ 44    | 0.39            | <b>0.01</b>     | 0.48        |
|               | 22:6n3 | 19(20)-EpDPE     | 708 $\pm$ 256   | 843 $\pm$ 205    | 2564 $\pm$ 1325  | 1257 $\pm$ 193  | 0.32            | 0.13            | 0.41        |
|               |        | 16(17)-EpDPE     | 4385 $\pm$ 1178 | 6790 $\pm$ 1158  | 14997 $\pm$ 6479 | 9043 $\pm$ 2059 | 0.26            | 0.09            | 0.62        |
| Vicinal Diols | 18:2n6 | 12,13-DiHOME     | 6.91 $\pm$ 0.18 | 10.1 $\pm$ 1.70  | 6.70 $\pm$ 0.51  | 5.27 $\pm$ 0.44 | <b>0.03</b>     | -               | -           |
|               |        | 9,10-DiHOME      | 19.5 $\pm$ 0.8  | 23.8 $\pm$ 3.3   | 9.3 $\pm$ 1.9    | 11.8 $\pm$ 1.0  | 0.67            | <b>&lt;0.01</b> | 0.12        |
|               | 18:3n3 | 15,16-DiHODE     | 2.71 $\pm$ 0.51 | 2.25 $\pm$ 0.24  | 2.42 $\pm$ 0.48  | 1.56 $\pm$ 0.21 | 0.61            | 0.23            | 0.12        |
|               |        | 12,13-DiHODE     | 0.48 $\pm$ 0.14 | 0.74 $\pm$ 0.15  | 1.15 $\pm$ 0.20  | 0.36 $\pm$ 0.07 | <b>&lt;0.01</b> | -               | -           |
|               |        | 9,10-DiHODE      | 1.60 $\pm$ 0.15 | 2.15 $\pm$ 0.45  | 1.73 $\pm$ 0.34  | 0.81 $\pm$ 0.11 | <b>0.03</b>     | -               | -           |
|               | 20:4n6 | 14,15-DiHETrE    | 1.66 $\pm$ 0.12 | 2.48 $\pm$ 0.30  | 0.81 $\pm$ 0.10  | 0.89 $\pm$ 0.19 | 0.09            | <b>&lt;0.01</b> | <b>0.04</b> |
|               |        | 11,12-DiHETrE    | 1.46 $\pm$ 0.09 | 2.05 $\pm$ 0.11  | 1.36 $\pm$ 0.09  | 0.81 $\pm$ 0.07 | <b>&lt;0.01</b> | -               | -           |
|               |        | 8,9-DiHETrE      | 4.68 $\pm$ 0.62 | 7.37 $\pm$ 0.45  | 2.57 $\pm$ 0.26  | 2.54 $\pm$ 0.13 | <b>0.01</b>     | -               | -           |
|               |        | 5,6-DiHETrE      | 15.6 $\pm$ 2.32 | 22.73 $\pm$ 1.52 | 10.23 $\pm$ 1.47 | 6.79 $\pm$ 0.37 | <b>0.01</b>     | -               | -           |
|               | 20:5n3 | 17,18-DiHETE     | 3.16 $\pm$ 0.43 | 4.02 $\pm$ 0.46  | 50.3 $\pm$ 5.1   | 45.8 $\pm$ 3.03 | 0.38            | <b>&lt;0.01</b> | 0.55        |
|               |        | 14,15-DiHETE     | 3.77 $\pm$ 0.47 | 4.83 $\pm$ 0.88  | 9.35 $\pm$ 0.98  | 8.00 $\pm$ 0.41 | 0.13            | <b>&lt;0.01</b> | 0.85        |
|               | 22:6n3 | 19,20-DiHDoPA    | 11.9 $\pm$ 1.0  | 15.4 $\pm$ 1.2   | 28.6 $\pm$ 2.9   | 20.4 $\pm$ 1.5  | <b>0.01</b>     | -               | -           |

**Table S5.** Heart mitochondrial lipid mediators (part 3 of 3). Unless otherwise noted units are in pmol/g. Low extraction efficiency or uncalibrated analytes are reported as relative abundance (%) across the experiment. Data is presented as group means  $\pm$  SEM ( $n = 4/\text{group}$ ). A two-way ANOVA with a diet  $\times$  chemo interaction was used to detect the differences between factors.  $p < 0.05$  are bolded. Vehicle – saline vehicle injections; Chemo – 9 mg/kg anthracycline + 90 mg/kg cyclophosphamide injections; Low n-3 – 0 g/kg EPA+DHA diet; High n-3 – 12.2 g/kg EPA+DHA diet (~2% kcal).

|                     |        |                     | Low n-3              |                  | High n-3         |                 | Diet X<br>Chemo | Diet            | Chemo       |
|---------------------|--------|---------------------|----------------------|------------------|------------------|-----------------|-----------------|-----------------|-------------|
|                     |        |                     | Vehicle              | Chemo            | Vehicle          | Chemo           |                 |                 |             |
| Ketones             | 18:2n6 | 13-KODE             | 1088 $\pm$ 116       | 1209 $\pm$ 75    | 737 $\pm$ 193    | 497 $\pm$ 79    | 0.17            | <b>&lt;0.01</b> | 0.64        |
|                     |        | 9-KODE              | 716 $\pm$ 86         | 786 $\pm$ 76     | 535 $\pm$ 186    | 291 $\pm$ 81    | 0.20            | <b>0.01</b>     | 0.47        |
|                     |        | 12(13)-Ep-9-KODE    | 20.1 $\pm$ 3.3       | 23.5 $\pm$ 1.0   | 14.6 $\pm$ 2.2   | 10.0 $\pm$ 0.8  | 0.09            | <b>&lt;0.01</b> | 0.80        |
|                     | 20:4n6 | 15-KETE             | 39.0 $\pm$ 0.9       | 53.9 $\pm$ 2.5   | 63.1 $\pm$ 10.5  | 37.2 $\pm$ 7.9  | <b>0.01</b>     | -               | -           |
|                     |        | 5-KETE              | 11.2 $\pm$ 1.7       | 16.3 $\pm$ 1.3   | 4.0 $\pm$ 1.0    | 4.9 $\pm$ 0.5   | 0.11            | <b>&lt;0.01</b> | <b>0.03</b> |
| N-Acylethanolamines | 16:0   | PEA                 | 503 $\pm$ 18         | 994 $\pm$ 214    | 1728 $\pm$ 385   | 556 $\pm$ 67    | <b>&lt;0.01</b> | -               | -           |
|                     | 18:0   | SEA                 | 737 $\pm$ 83         | 1579 $\pm$ 338   | 2465 $\pm$ 544   | 828 $\pm$ 126   | <b>&lt;0.01</b> | -               | -           |
|                     | 16:1n7 | POEA (%)            | 2.14 $\pm$ 0.35      | 3.11 $\pm$ 0.81  | 13.16 $\pm$ 2.60 | 3.18 $\pm$ 0.65 | <b>&lt;0.01</b> | -               | -           |
|                     | 18:1n9 | OEA                 | 264 $\pm$ 23         | 517 $\pm$ 113    | 660 $\pm$ 153    | 199 $\pm$ 33    | <b>&lt;0.01</b> | -               | -           |
|                     | 18:2n6 | LEA                 | 25.1 $\pm$ 1.7       | 48.1 $\pm$ 11.7  | 43.9 $\pm$ 9.6   | 15.3 $\pm$ 2.2  | <b>0.01</b>     | -               | -           |
|                     | 18:3n3 | aLEA                | 129 $\pm$ 15         | 227 $\pm$ 57     | 298 $\pm$ 71     | 86 $\pm$ 19     | <b>0.01</b>     | -               | -           |
|                     | 20:3n6 | DGLEA               | 26.1 $\pm$ 1.0       | 62.6 $\pm$ 18.5  | 54.6 $\pm$ 17.5  | 13.7 $\pm$ 1.8  | <b>0.01</b>     | -               | -           |
|                     | 20:4n6 | AEA                 | 1064 $\pm$ 102       | 2405 $\pm$ 616   | 1166 $\pm$ 231   | 503 $\pm$ 71    | <b>0.01</b>     | -               | -           |
|                     |        | 11(12)-EpETrE<br>EA | 1.99 $\pm$ 0.20      | 4.87 $\pm$ 1.03  | 2.40 $\pm$ 0.81  | 1.22 $\pm$ 0.11 | <b>0.01</b>     | -               | -           |
|                     | 20:5n3 | EPEA (%)            | 0.27 $\pm$ 0.03      | 0.64 $\pm$ 0.18  | 18.73 $\pm$ 4.60 | 5.34 $\pm$ 1.10 | <b>0.01</b>     | -               | -           |
|                     | 22:5n6 | DEA                 | 34575 $\pm$<br>14112 | 10548 $\pm$ 5468 | 10097 $\pm$ 8275 | 7196 $\pm$ 4302 | 0.26            | 0.14            | 0.16        |
|                     | 22:6n3 | DHEA                | 5850 $\pm$ 150       | 10298 $\pm$ 1750 | 16775 $\pm$ 2357 | 7605 $\pm$ 1013 | <b>&lt;0.01</b> | -               | -           |
|                     | 18:1n9 | 10-Nitrooleate      | 3.71 $\pm$ 0.44      | 6.63 $\pm$ 1.12  | 2.56 $\pm$ 0.58  | 3.26 $\pm$ 1.28 | 0.26            | <b>0.03</b>     | 0.08        |
|                     | 18:1n9 | NO-Gly              | 0.09 $\pm$ 0.04      | 0.14 $\pm$ 0.04  | 0.10 $\pm$ 0.02  | 0.12 $\pm$ 0.07 | 0.77            | 0.88            | 0.48        |
